# Supplementary material
Source: Elsevier journal article supplement (https://www.sciencedirect.com/science/article/pii/S0210569121001881)

## a. Mortality at the longest follow-up

### Subgroup analyses according to oxygen delivery system (invasive mechanical ventilation, others)

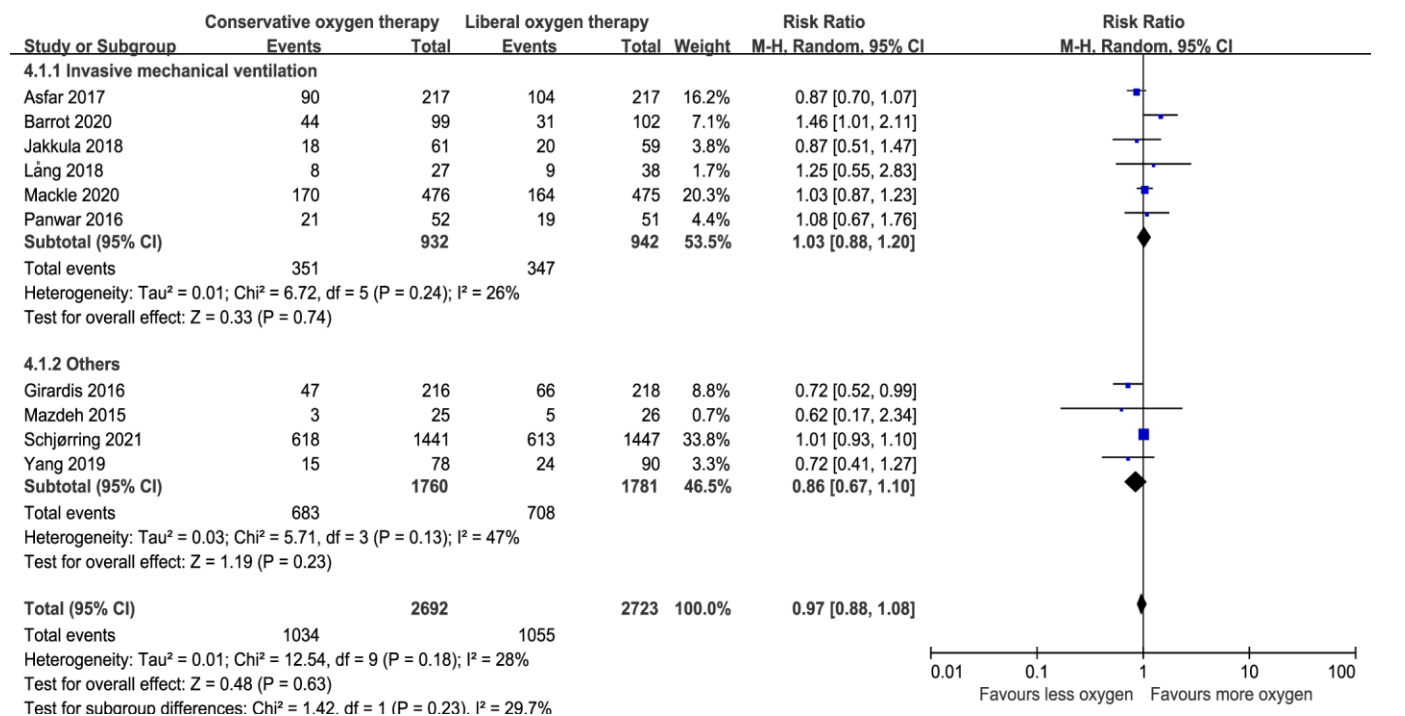

### Subgroup analyses according to duration of intervention (more than 48 hours, less than 48 hours)

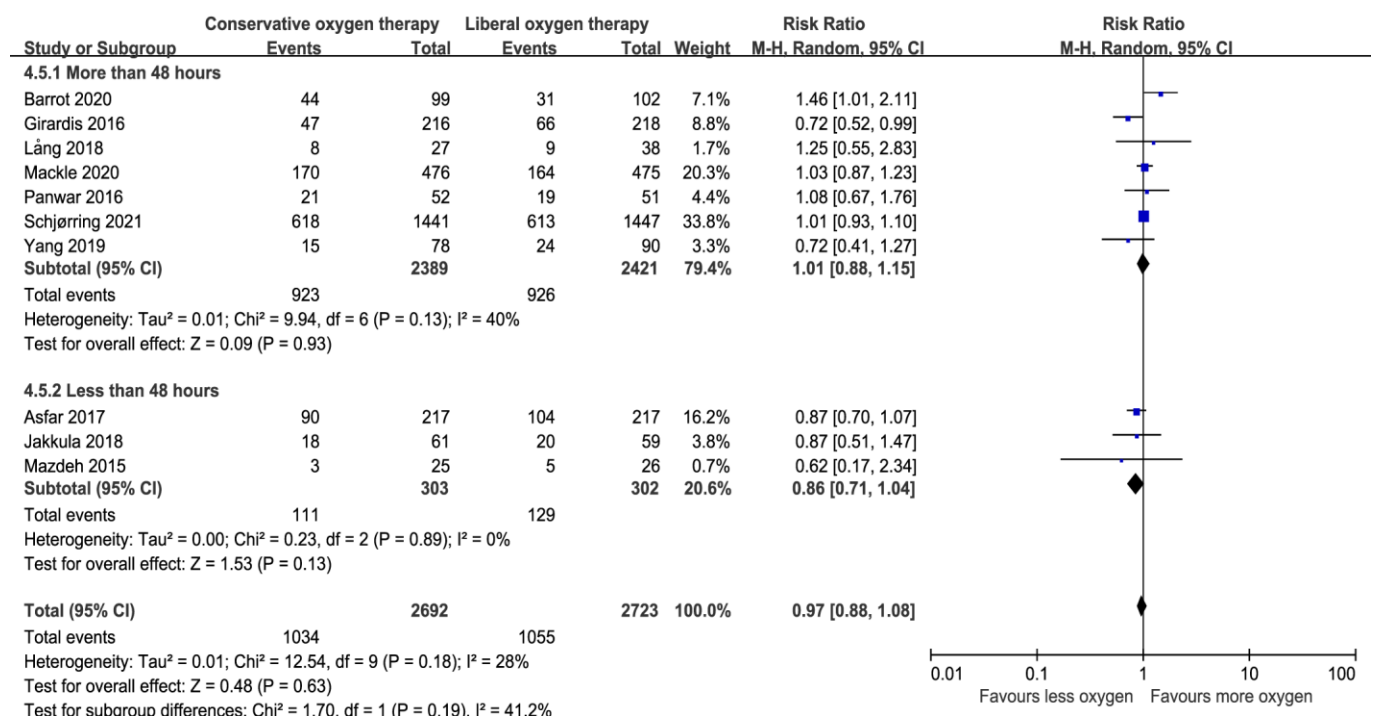

## Sensitivity analyses by using the fixed-effects model

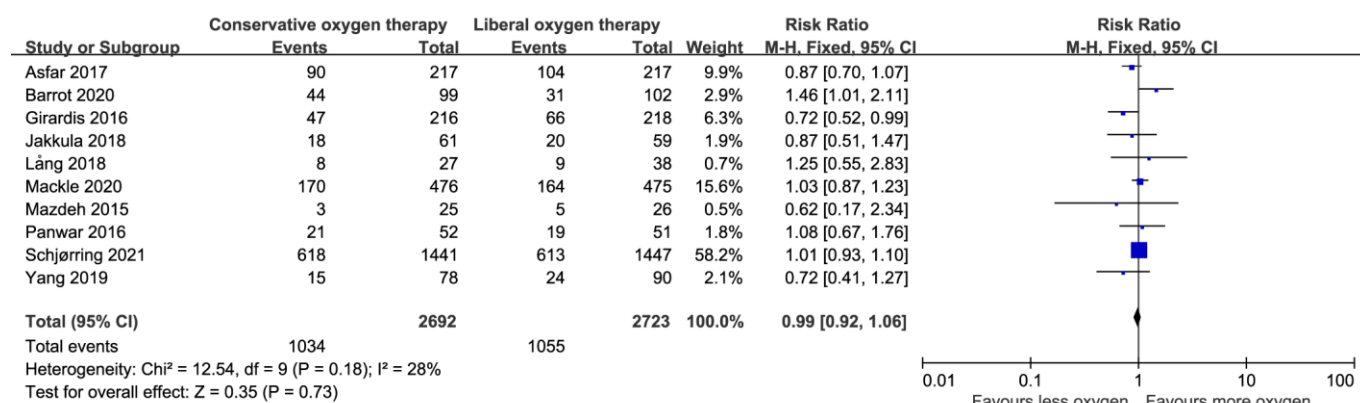

## Sensitivity analyses by excluding the study of specific diseases

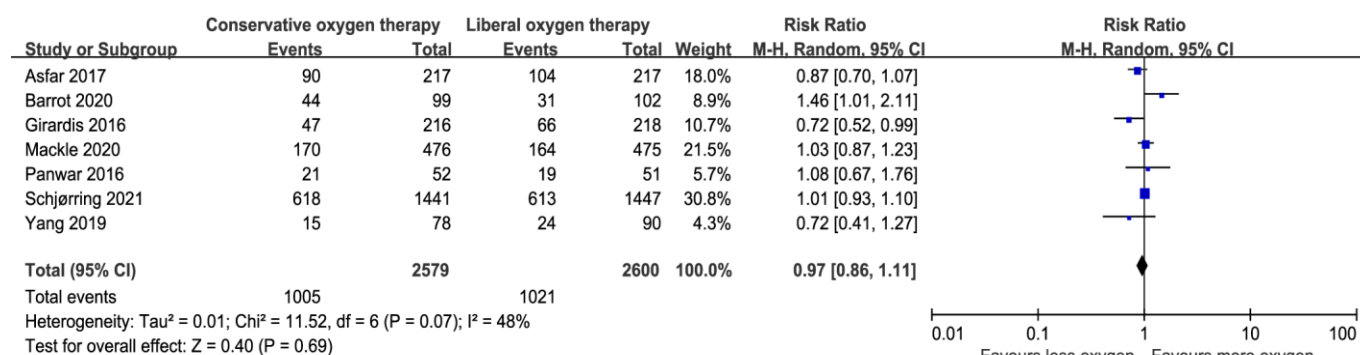

## Sensitivity analyses by excluding the study dividing groups by FiO2

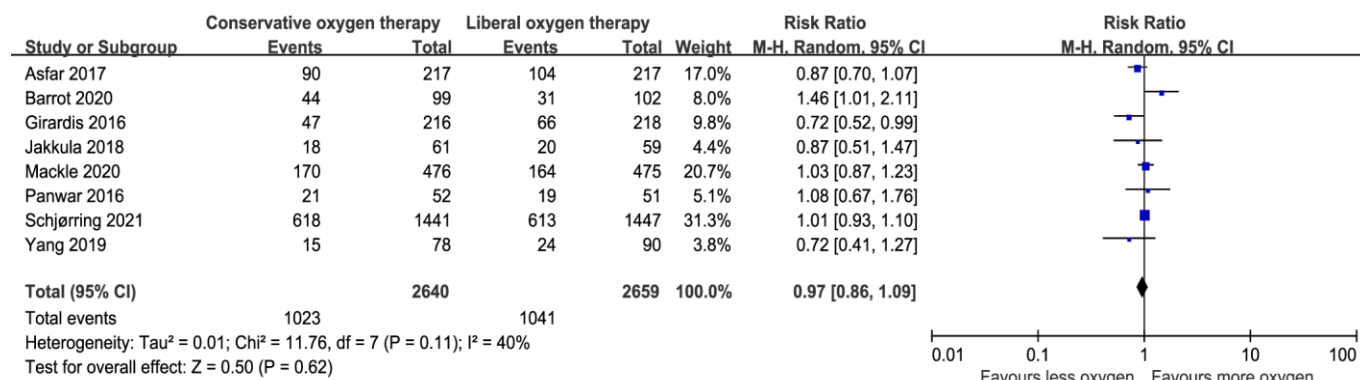

## Sensitivity analyses by excluding the study conducted by Schjørring et al

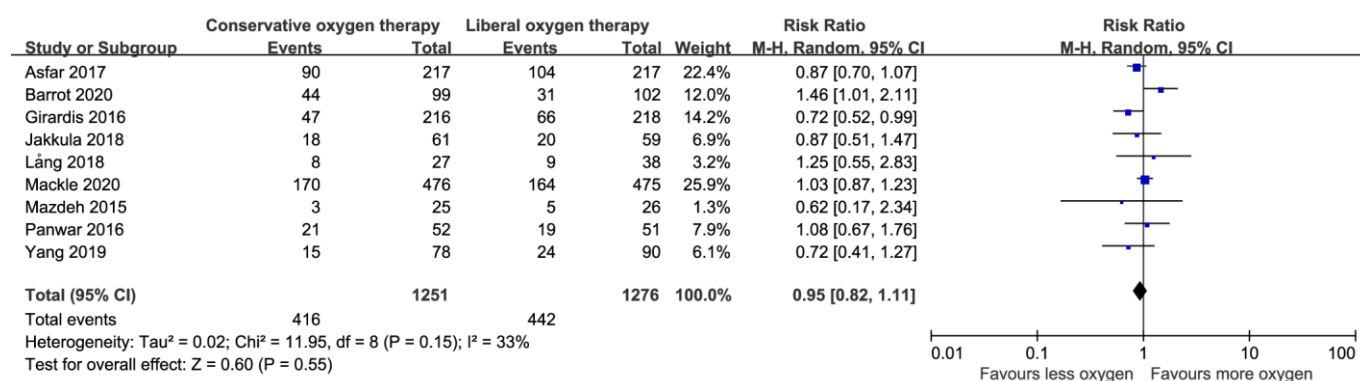

## Best-worst scenario analysis

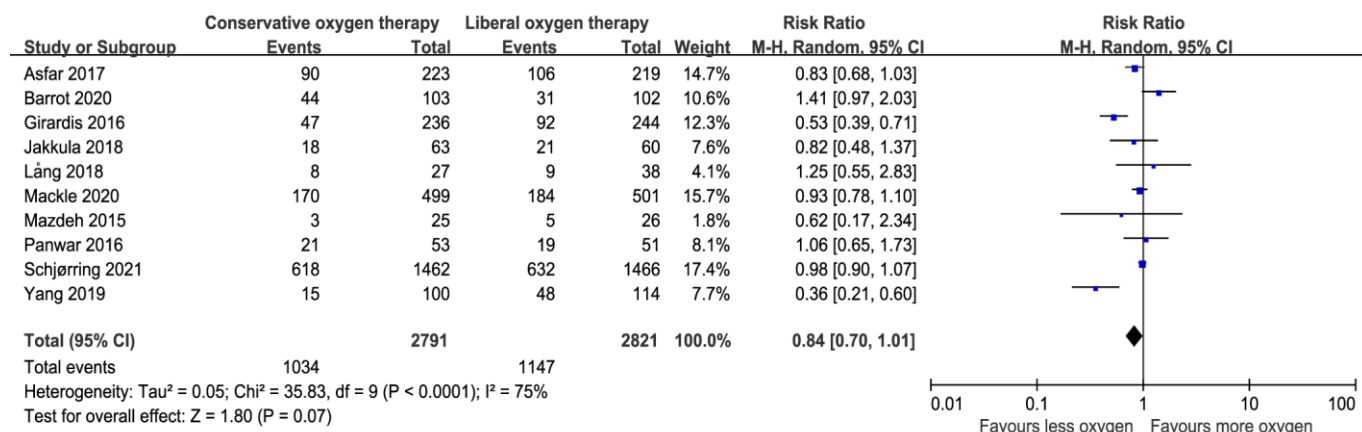

## Worst-best scenario analysis

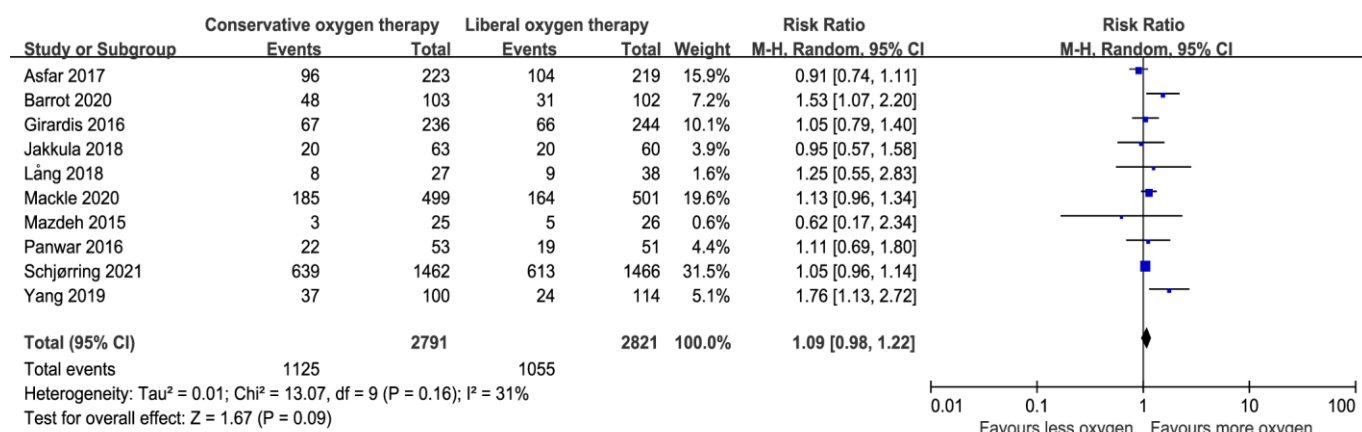

## b. Mortality at 28 days

### Subgroup analyses according to oxygen delivery system (invasive mechanical ventilation, others)

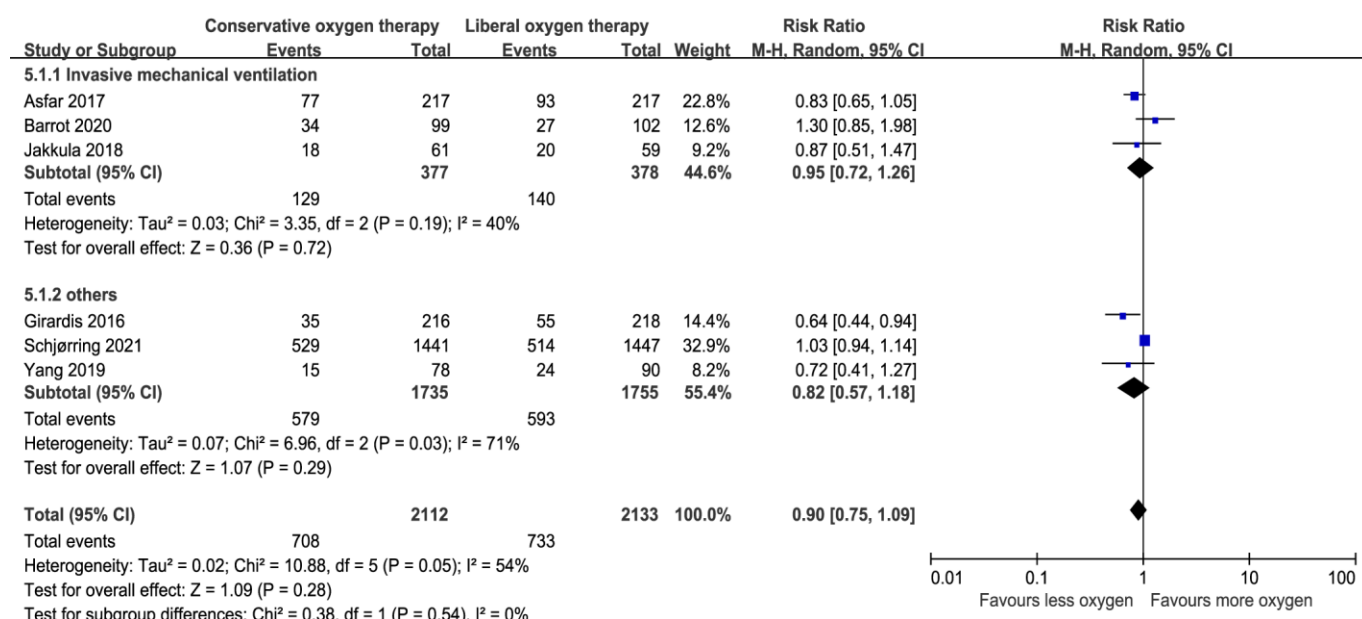

### Subgroup analyses according to duration of intervention (more than 48 hours, less than 48 hours)

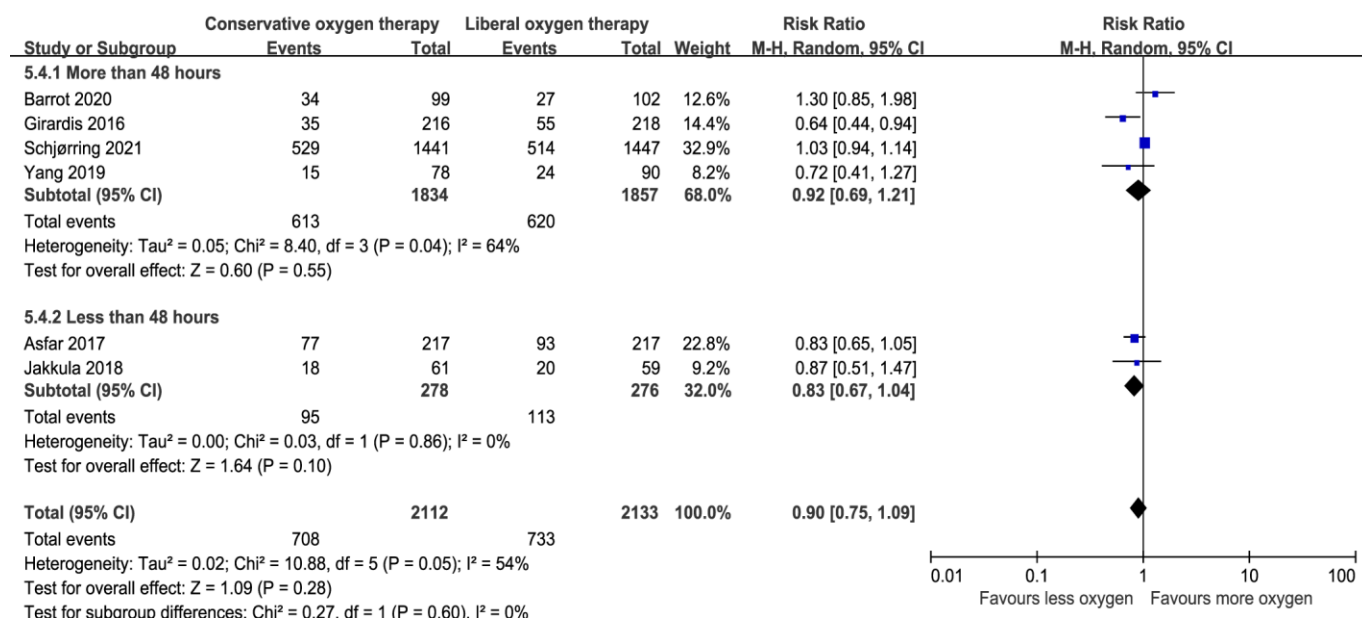

## Sensitivity analyses by using the fixed-effects model

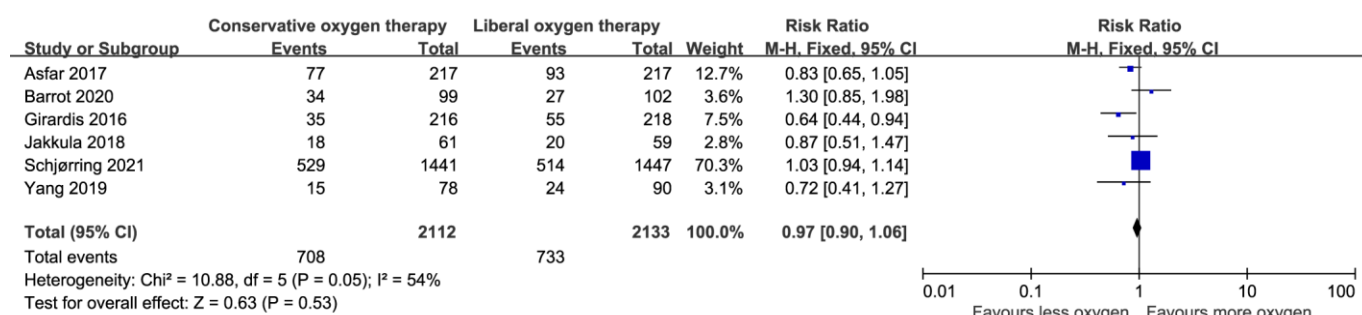

## Sensitivity analyses by excluding the study of specific diseases

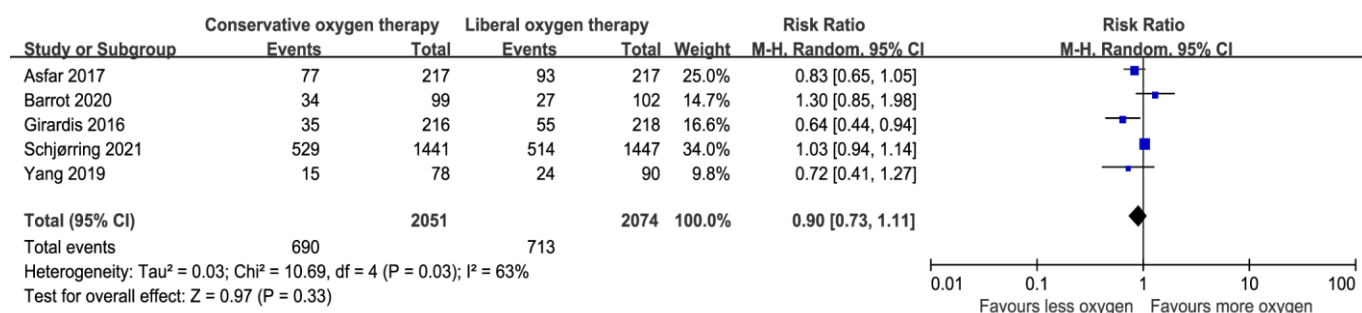

## Sensitivity analyses by excluding the study conducted by Schjørring et al

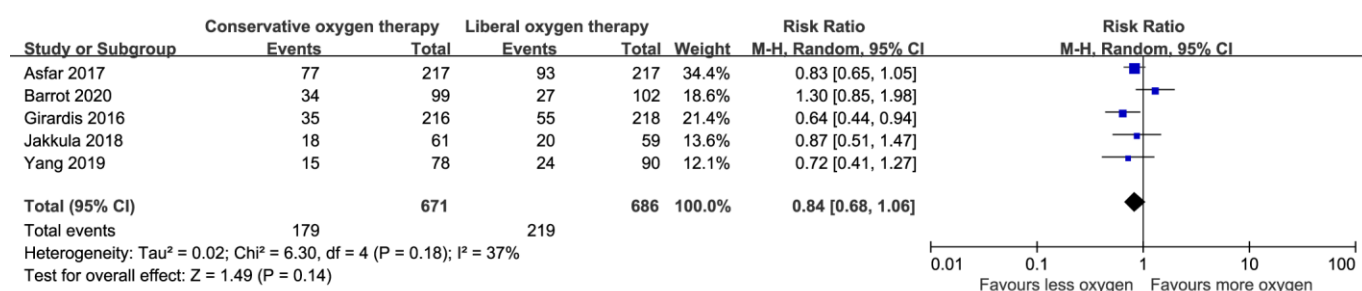

## Best-worst scenario analysis

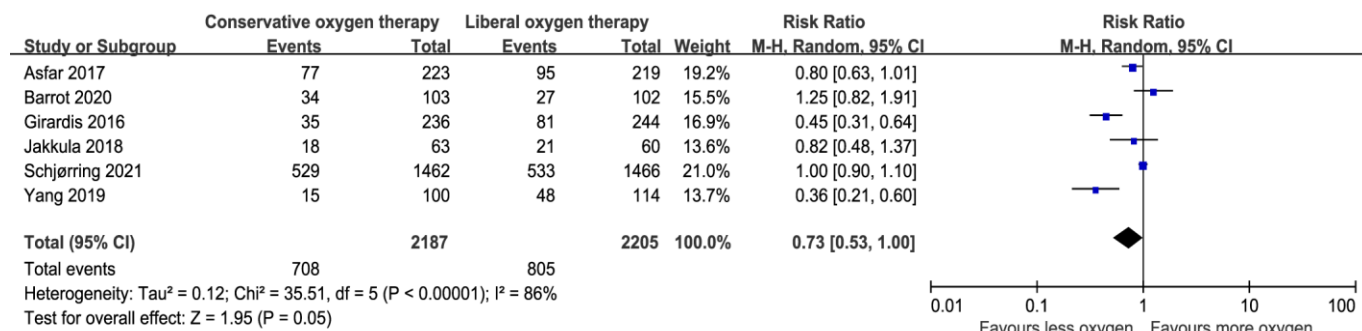

## Worst-best scenario analysis

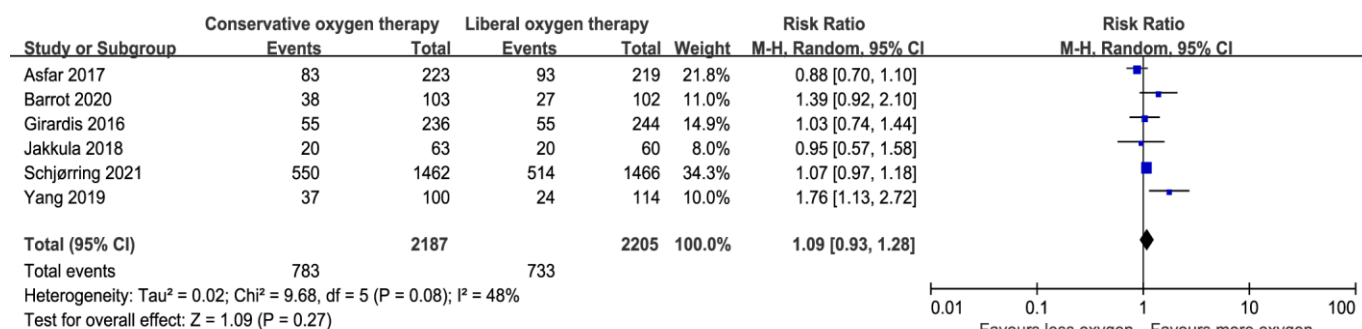

## c. Mortality at 90 days

### Subgroup analyses according to oxygen delivery system (invasive mechanical ventilation, others)

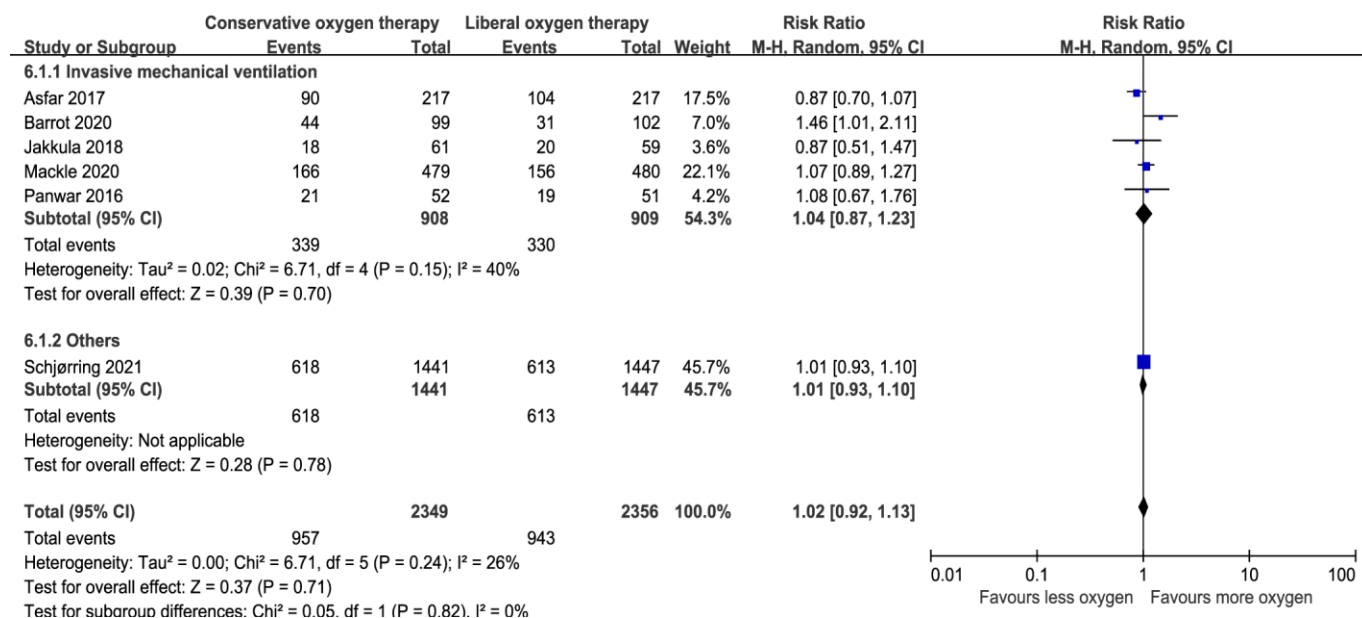

### Subgroup analyses according to duration of intervention (more than 48 hours, less than 48 hours)

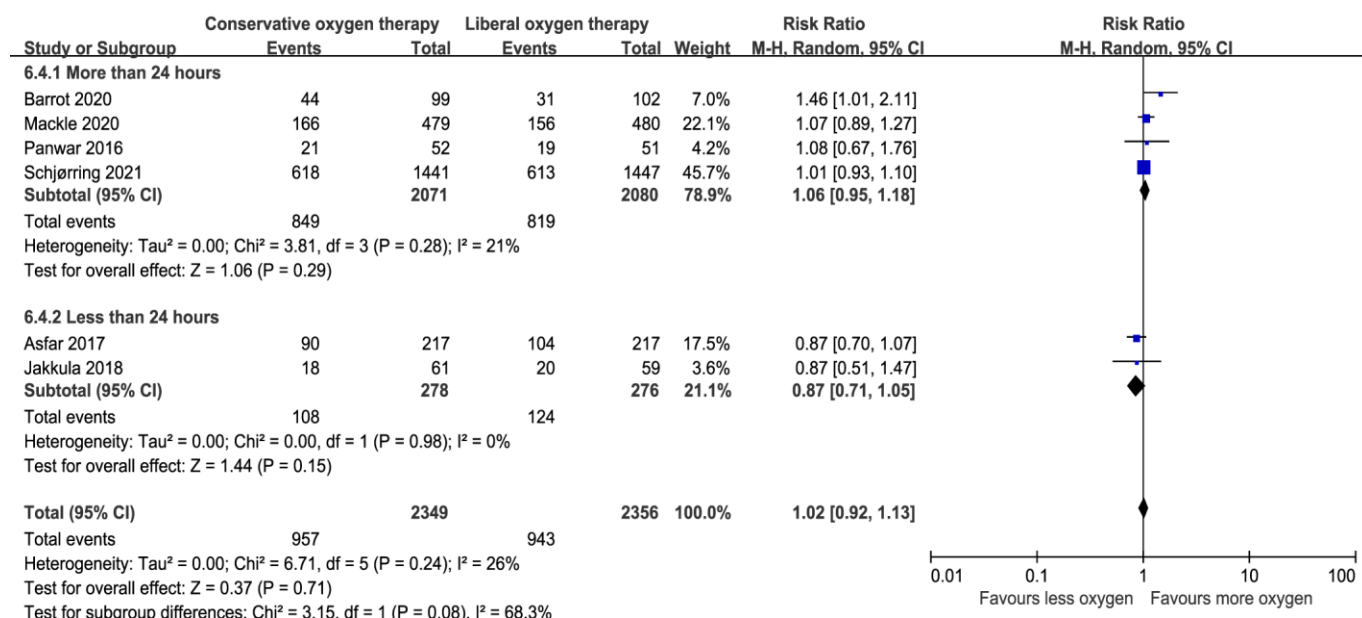

## Sensitivity analyses by using the fixed-effects model

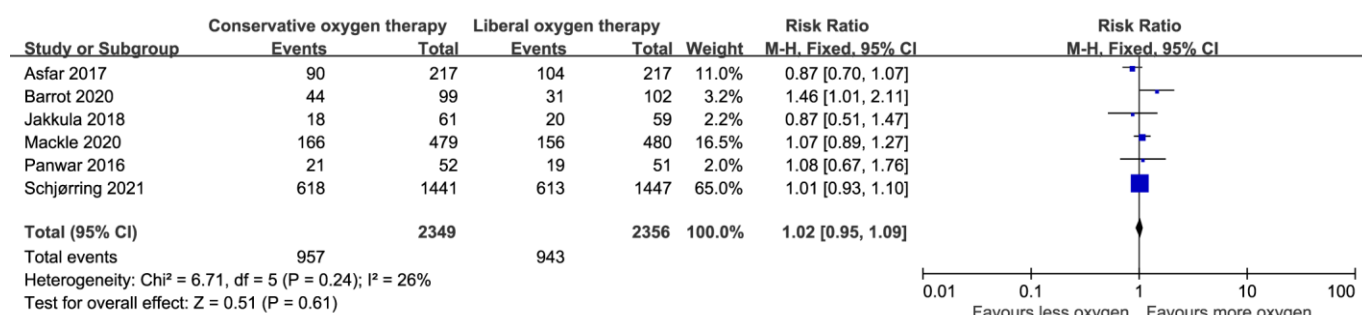

## Sensitivity analyses by excluding the study of specific diseases

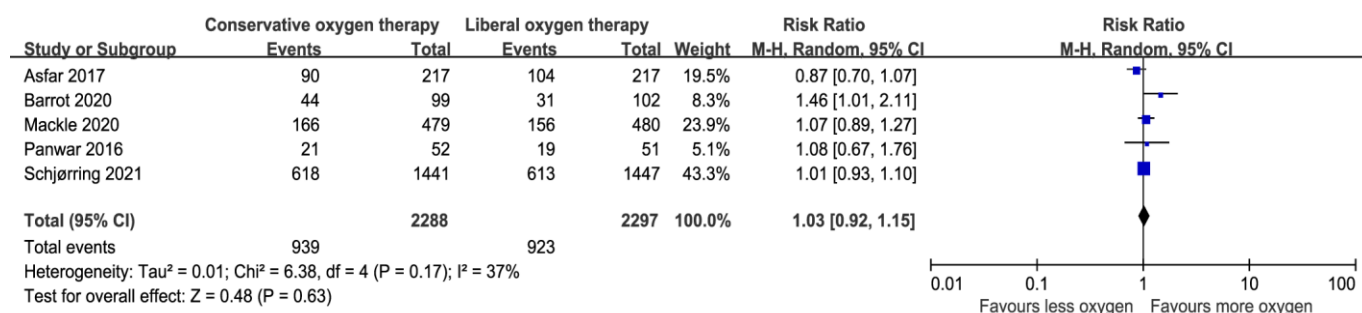

## Sensitivity analyses by excluding the study conducted by Schjørring et al

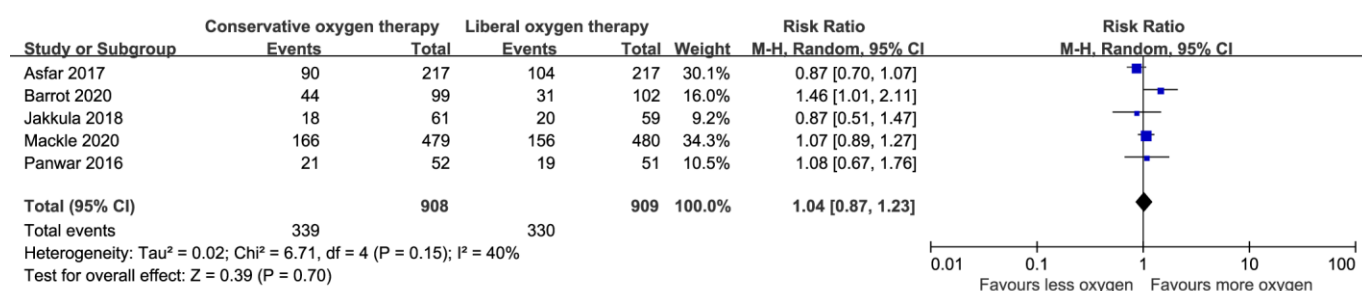

## Best-worst scenario analysis

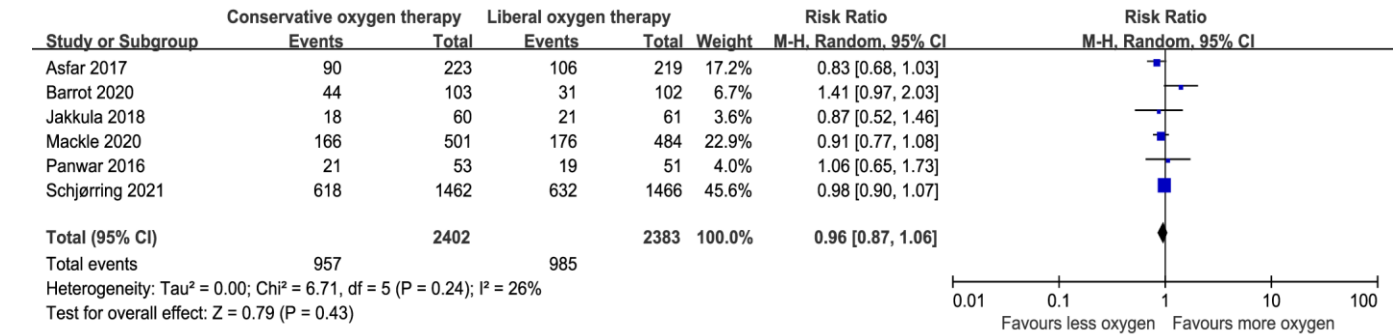

Worst-best scenario analysis

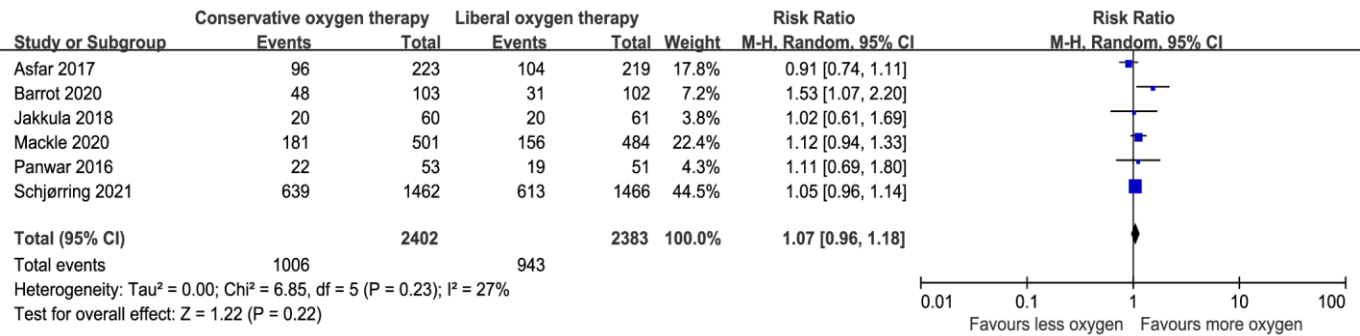

Supplement: mmc6 [file S0210569121001881:mmc6.pdf]
