# Supplementary material
Source: Elsevier journal article supplement (https://www.sciencedirect.com/science/article/pii/S0210569121001881)

**a. Funnel plot and Egger's test to evaluate potential publication bias for mortality at the longest follow-up**

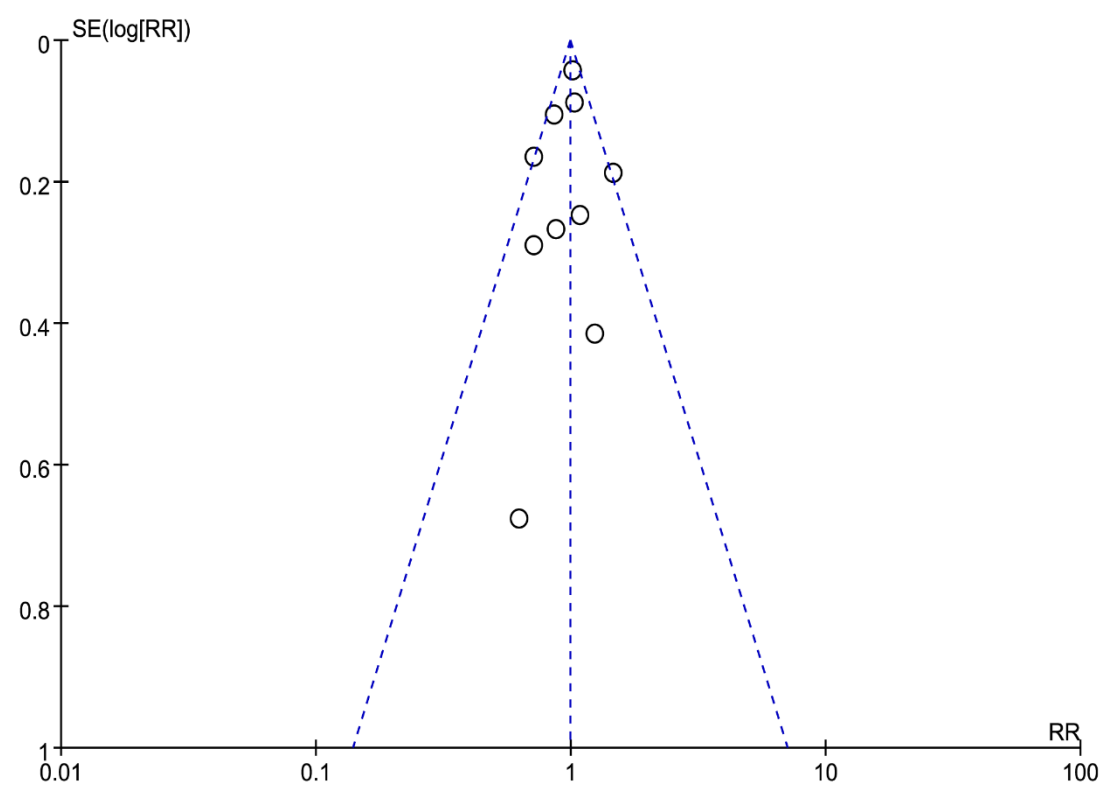

| Egger's test |           |           |       |       |                      |           |
|--------------|-----------|-----------|-------|-------|----------------------|-----------|
| Std_Eff      | Coef.     | Std. Err. | t     | P> t  | [95% Conf. Interval] |           |
| slope        | -1.484513 | .4334224  | -3.43 | 0.009 | -2.483986            | -.4850386 |
| bias         | -8.232066 | 2.647557  | -3.11 | 0.014 | -14.33734            | -2.12679  |

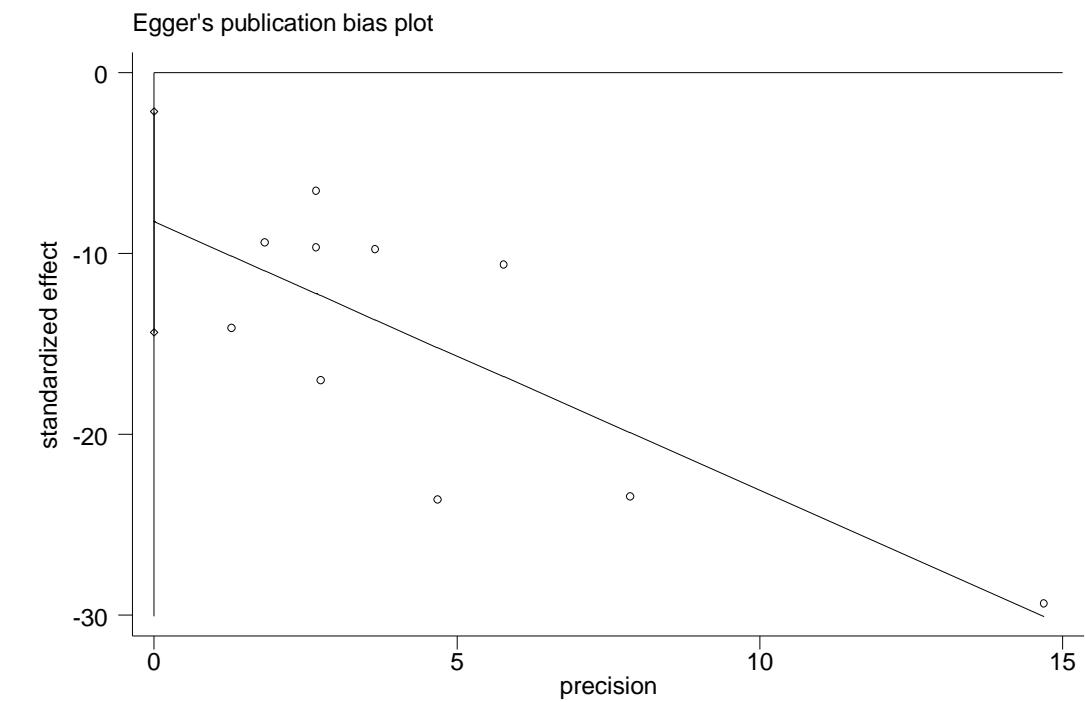

**b. Funnel plot and Egger's test to evaluate potential publication bias for mortality at 28 days**

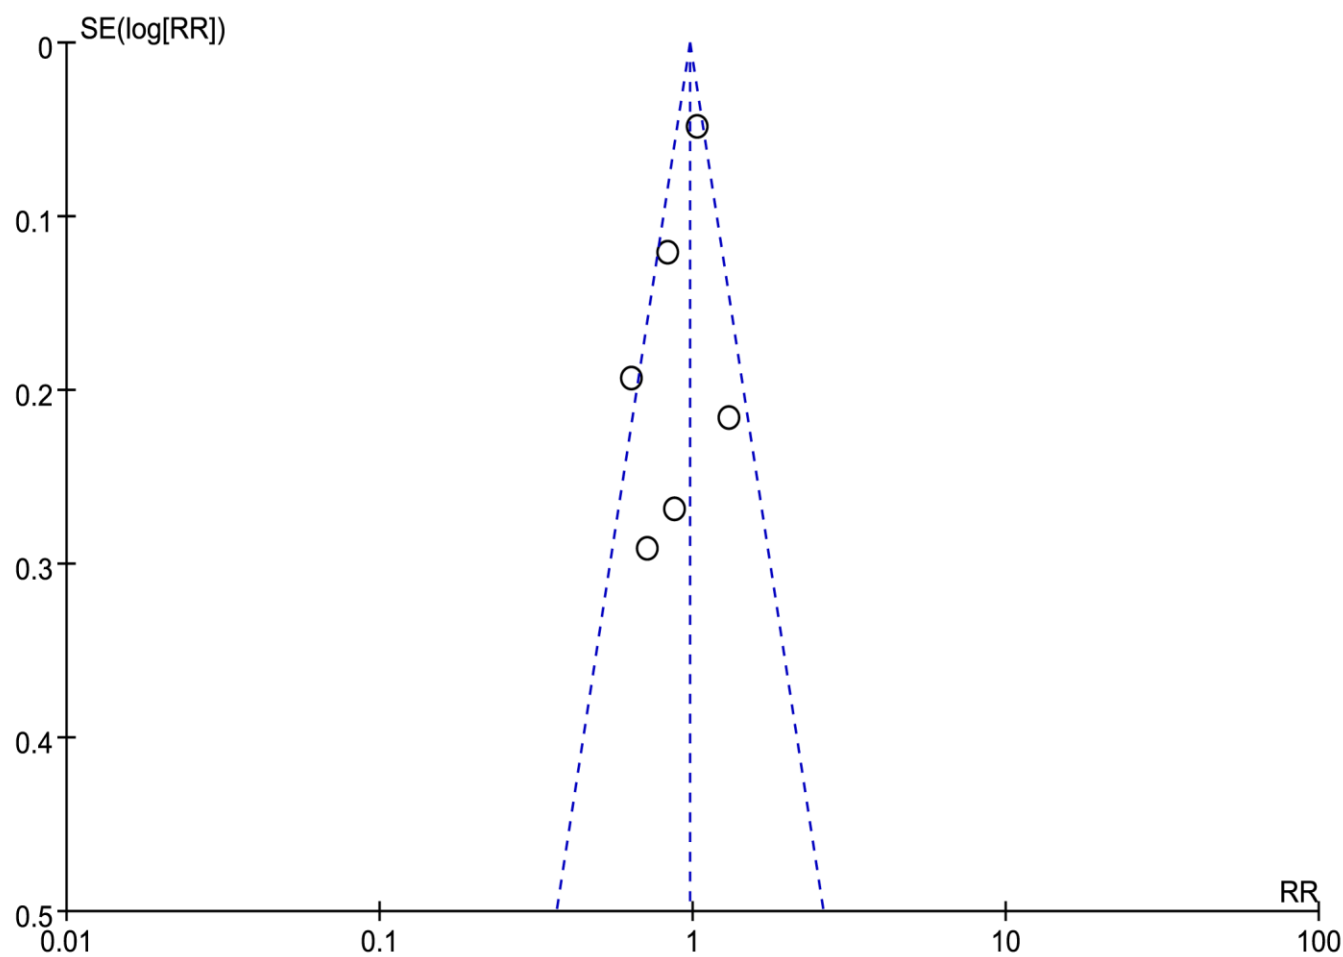

Egger's test

| Std_Eff | Coef.     | Std. Err. | t     | P> t  | [95% Conf. Interval] |          |
|---------|-----------|-----------|-------|-------|----------------------|----------|
| slope   | -2.156078 | .8247453  | -2.61 | 0.059 | -4.445938            | .1337822 |
| bias    | -8.895122 | 5.492323  | -1.62 | 0.181 | -24.14426            | 6.354011 |

Egger's publication bias plot

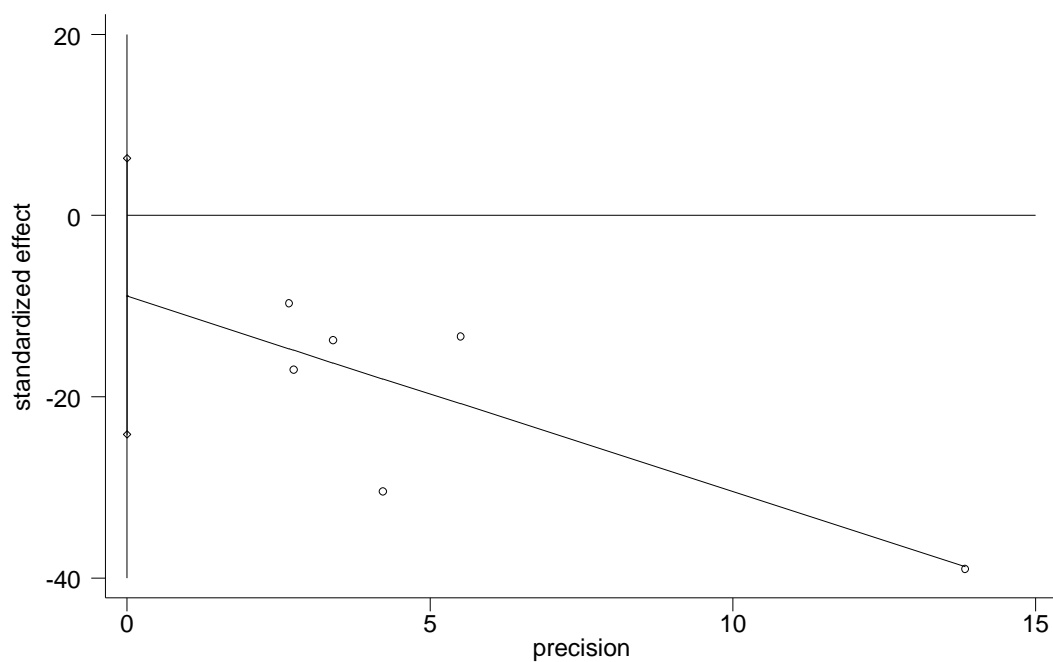

c. Funnel plot and Egger's test to evaluate potential publication bias for mortality at 90 days

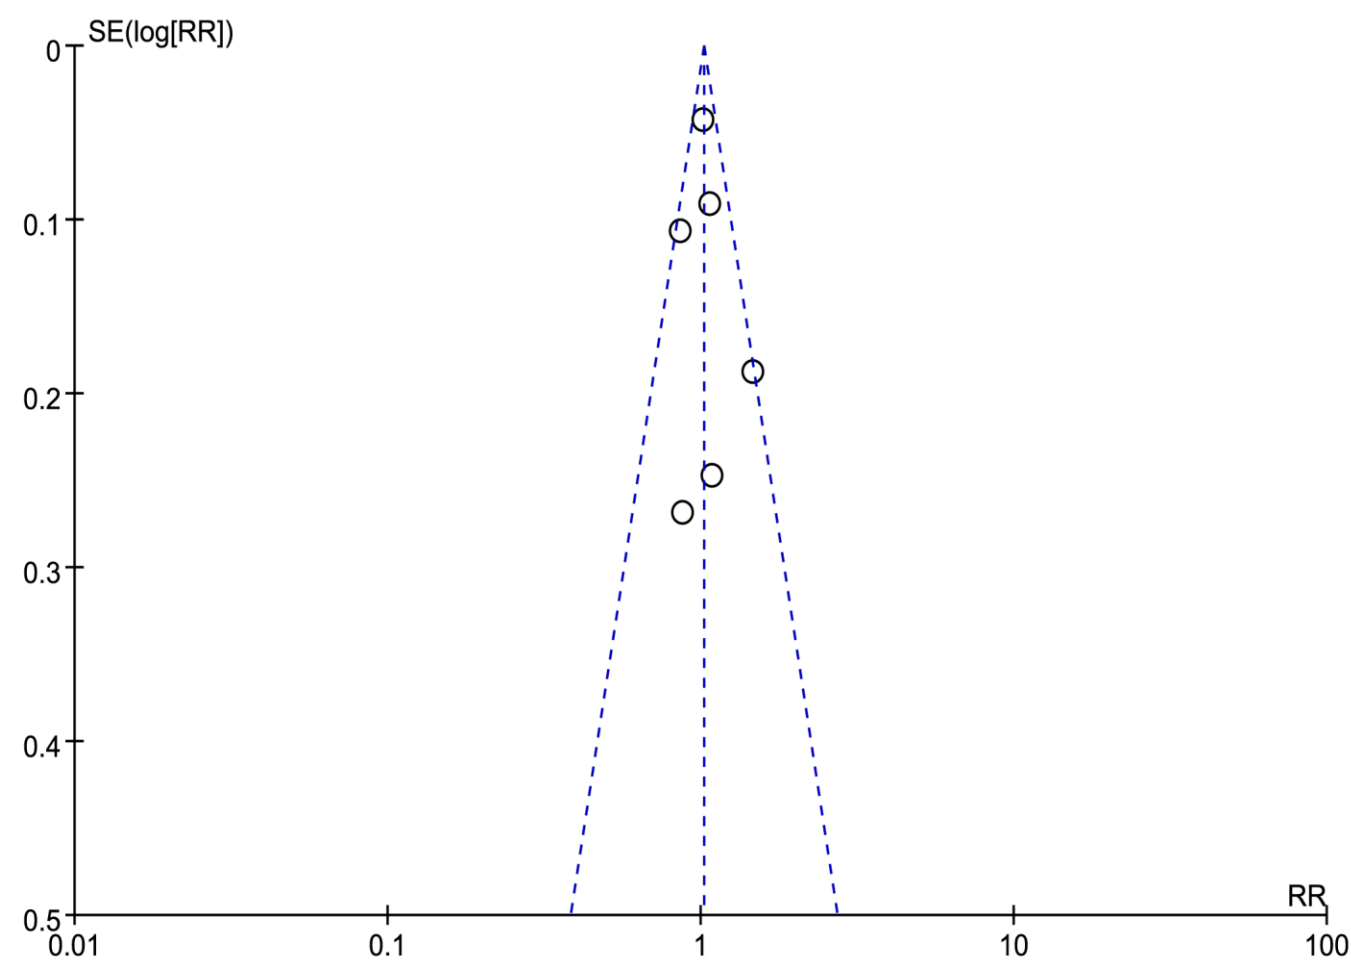

| Egger's test |           |           |       |       |                      |           |
|--------------|-----------|-----------|-------|-------|----------------------|-----------|
| Std_Eff      | Coef.     | Std. Err. | t     | P> t  | [95% Conf. Interval] |           |
| slope        | -1.904848 | .4203218  | -4.53 | 0.011 | -3.071849            | -.7378477 |
| bias         | -3.376278 | 3.150702  | -1.07 | 0.344 | -12.12403            | 5.371474  |

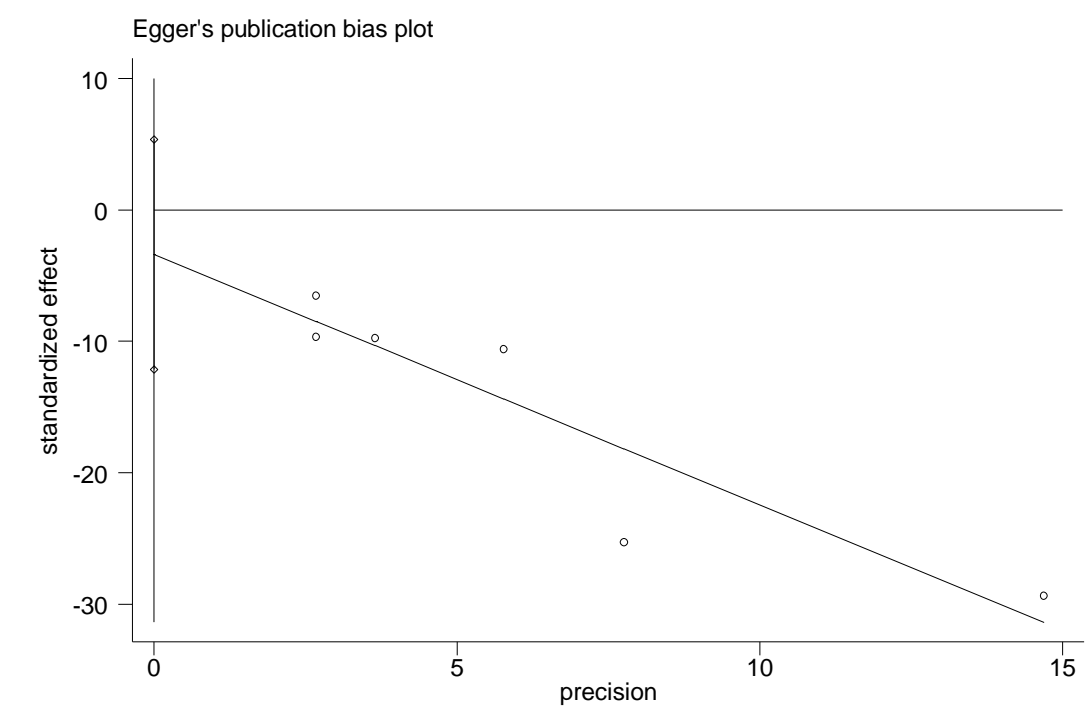

Supplement: mmc4 [file S0210569121001881:mmc4.pdf]
